# Supplementary material for: High Rates of Genome Rearrangements and Pathogenicity of Shigella spp
Source: PubMed Central journal article supplement (PMC8072062; doi:10.3389/fmicb.2021.628622), 2021-04-12

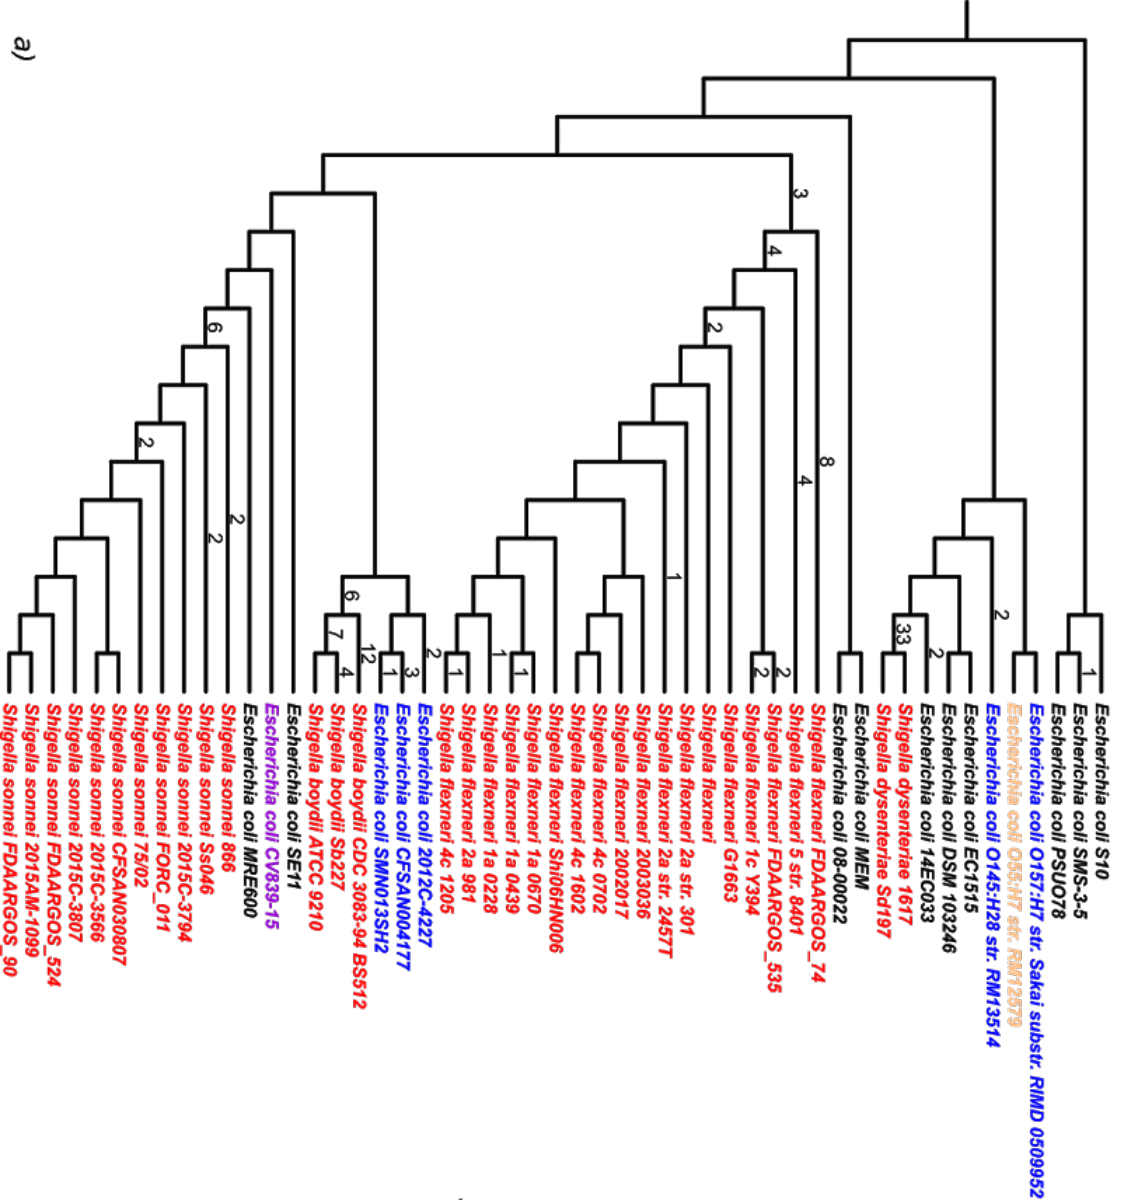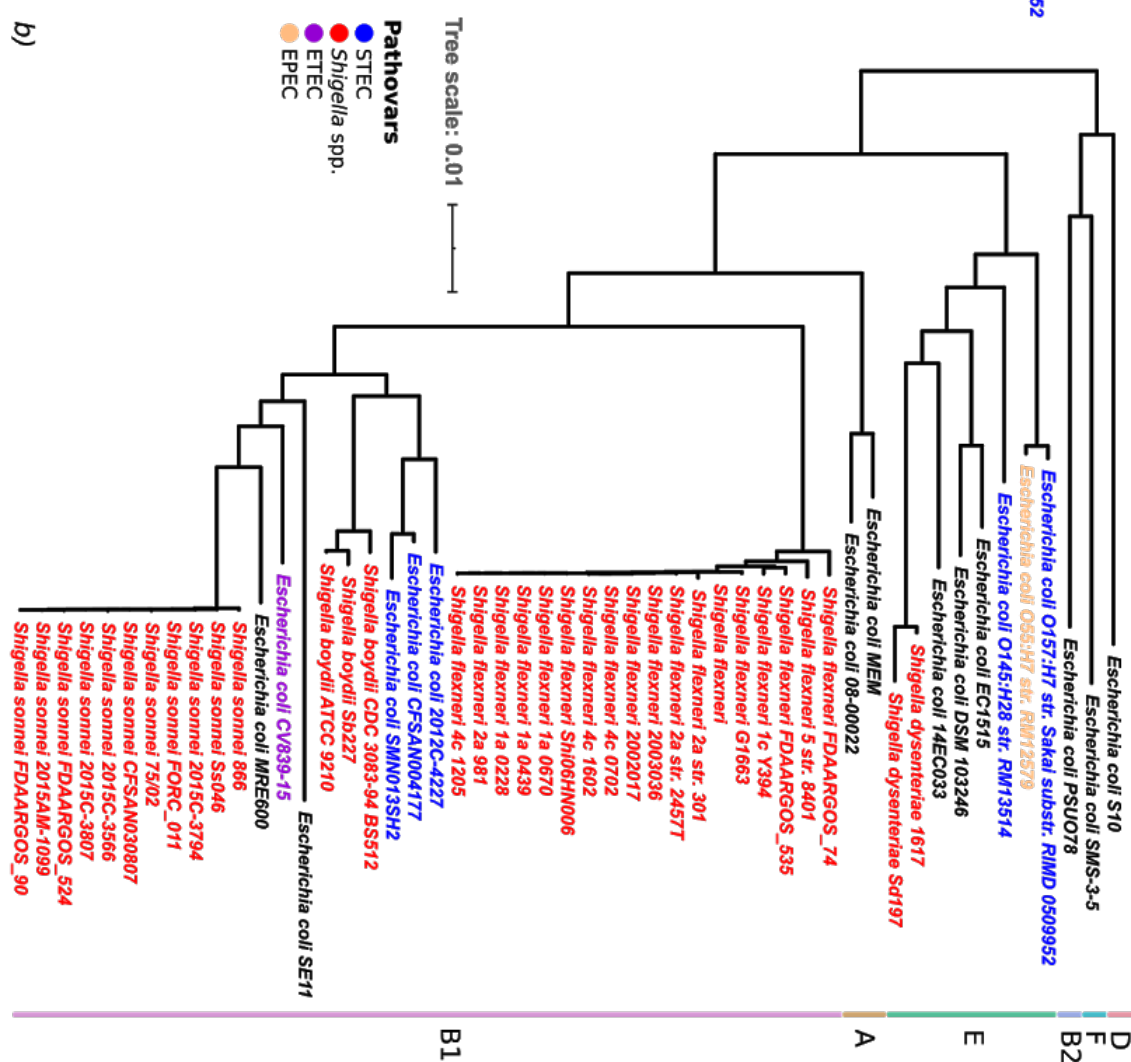

Supplement: Image_5.pdf [file Image_5.pdf]
